# Supplementary material for: Nanoarchitectonics of neomycin-derived fluorescent carbon dots for selective detection of Fe3+ ions
Source: Royal Society of Chemistry journal article supplement (doi:10.1039/d2ay01040b), 2022-01-01
Supplement: d2ay01040b1.pdf [file d2ay01040b1.pdf]

# Electronic Supporting Information

## Nanoarchitectonics of Neomycin-derived fluorescent carbon dots for selective detection of Fe<sup>3+</sup> ion

Ratan W. Jadhav, Pritesh P. Khobrekar, Sandesh T. Bugde, Sheshanath V. Bhosale\*

School of Chemical Sciences, Goa University, Taleigao Plateau, Goa 403 206, INDIA

\*Authors for correspondence: Email: [svbhosale@unigoa.ac.in](mailto:svbhosale@unigoa.ac.in)

### HRTEM Images:

The HRTEM samples were deposited on Ultrathin Carbon Film on Lacey Carbon Support Film, 400 mesh, Copper TEM grd. The samples were dried overnight in vacuum before imaging on a JEOL 2010 LAB6 TEM.

### UV-Vis Spectra:

The UV-vis absorption spectra for Neo-CQD were collected in a quartz cuvette using a UV-Vis 1800 Shimadzu spectrophotometer

### Fluorescence Spectra:

The fluorescence emission spectra measured on an Agilent, Carry Eclipse spectrofluorophotometer at 340 nm excitation wavelength.

### Quantum Yield Calculations:

The quantum yield of Neo-CDs has been calculated in different solvents using quinine sulfate as a reference, which are reported in **Table S1**. In DDW the Neo-CDs showed highest quantum yield of 55%, whereas lowest in the acetonitrile.

**Table 1:** Quantum yield of Neo-CDs in different solvents.

| Sr. No. | Solvent                | $\lambda_{\max}$ | Quantum yield |
|---------|------------------------|------------------|---------------|
| 1       | Double distilled water | 0.182            | 0.55          |
| 2       | acetone                | 0.137            | 0.40          |
| 3       | acetonitrile           | 0.415            | 0.19          |
| 4       | DMF                    | 0.255            | 0.38          |
| 5       | ethanol                | 0.253            | 0.34          |
| 6       | DMSO                   | 0.33             | 0.37          |
| 7       | THF                    | 0.331            | 0.20          |

## Photobleaching study

The Neo-CDs have been irradiated under 365 nm UV light and measured the fluorescence emission at time interval, **Figure S1a**. We found that the Neo-CDs were stable upon irradiation of 365 nm UV light for 100 minutes. Further we extended our study, the Neo-CDs then irradiated with 254 nm UV light (higher energy) and subjected to fluorescence spectroscopy. We found that at fluorescence intensity goes on decreasing with increase in irradiation time. The fluorescence intensity decreased from 661 to 415 after irradiation of 254 nm UV light for 100 min, **Figure S1b**. These results indicates that the as prepared Neo-CDs are much more stable under 365 nm UV light compared to 254 nm UV light.

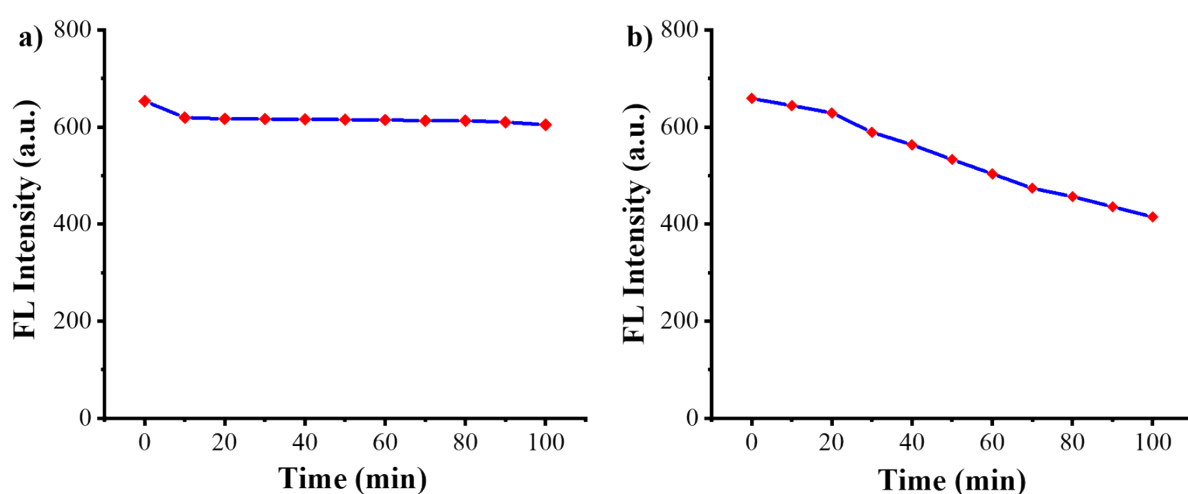

**Figure S1.** The fluorescence intensity of the Neo-CDs under a) 365 nm and b) 254 nm UV light at different time.

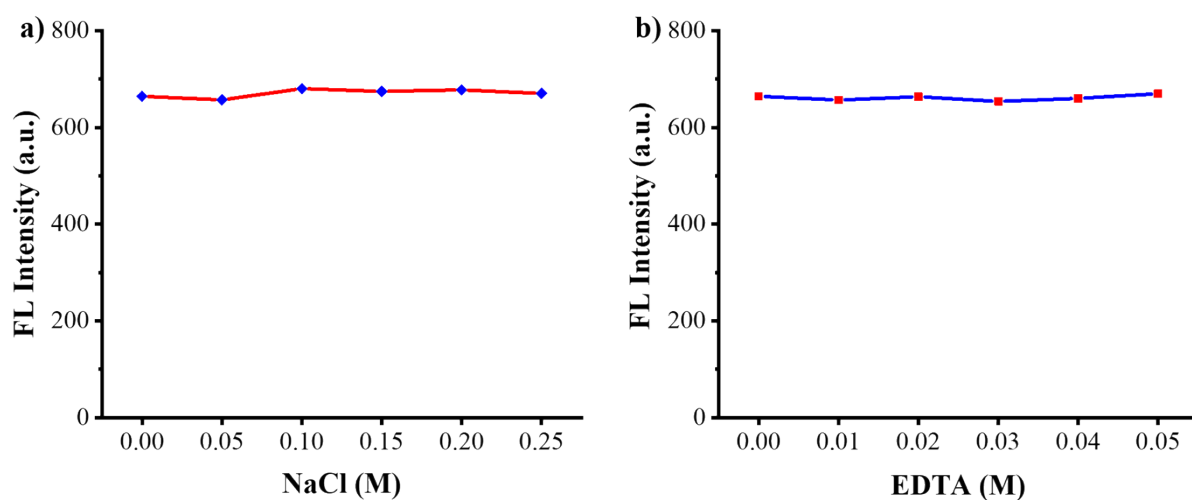

**Figure S2.** (a) Effect of concentration of NaCl as an ionic strength at  $\lambda_{\text{ex}} = 340$  nm (b) Effect of concentration of EDTA as a masking agent  $\lambda_{\text{ex}} = 340$  nm.

### Effect of pH:

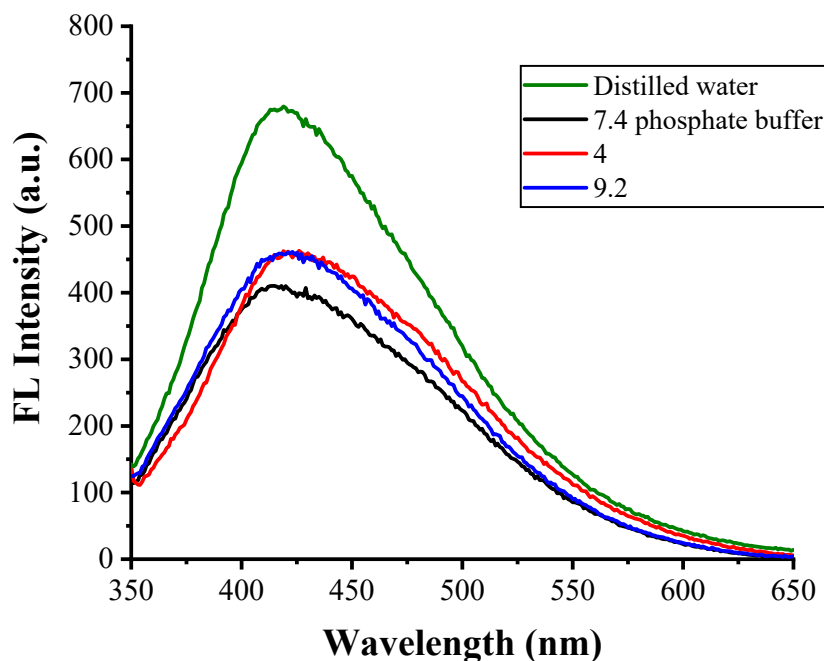

**Figure S3:** The effect of pH on the fluorescence intensity of the as-prepared Neo-CDs ( $\lambda_{\text{ex}} = 340$  nm).

### Cyclic Voltammetry:

Cyclic voltammogram (CV) were recorded on electrochemical workstation –CH instrument, Inc. CHI6107. CV was recorded to determine the redox property of the Neo-CDs. From the CV it was observed that it shows supercapacitive (reference) behaviour. A three-electrode cell with a platinum working electrode, a silver reference (Ag/AgCl) electrode and a platinum wire as counter electrode in water containing 2M potassium chloride as the supporting electrolyte and 1 mL H<sub>2</sub>O containing 0.3 mg CNDs as the sample at a scan rate of 100 mV/s under room temperature

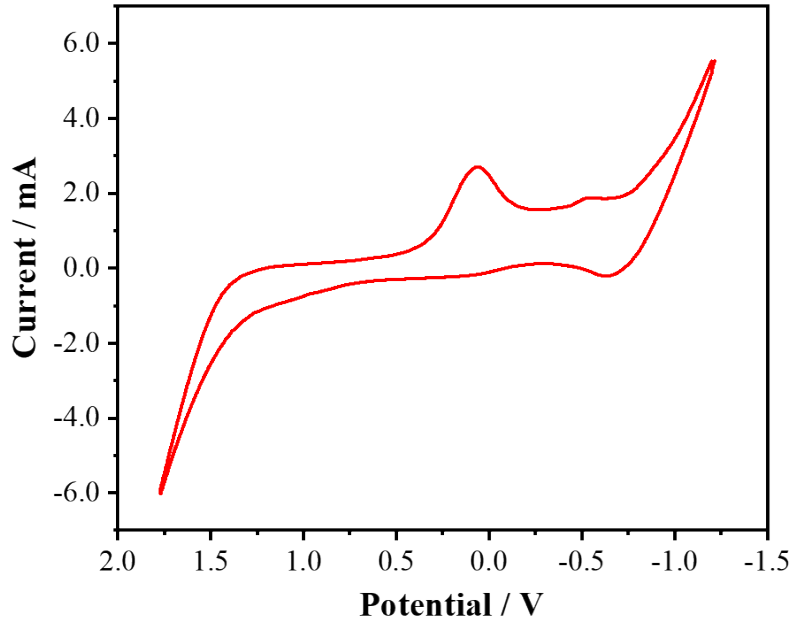

**Figure S4:** Cyclic voltammogram of Neo-CDs

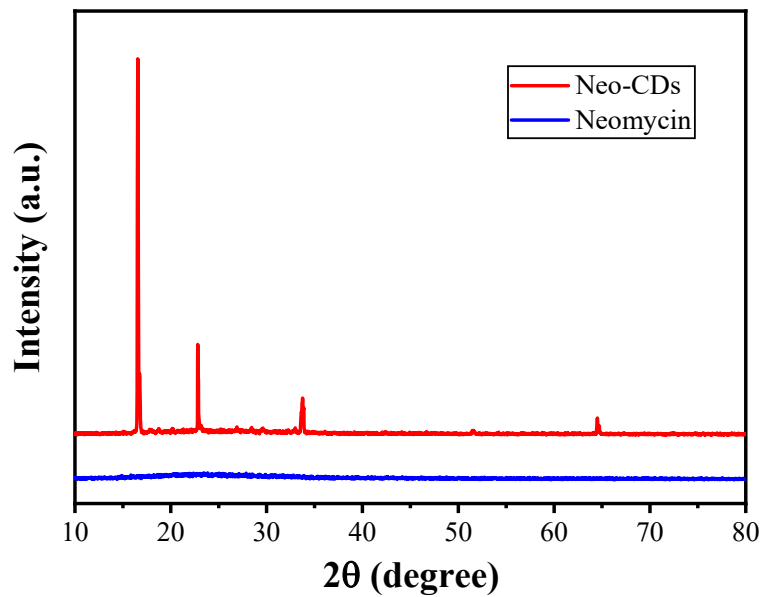

**Figure S4:** Thin film XRD of Neo-CDs

**XPS:**

X-ray photoelectron spectroscopy (XPS) recorded using PHI 5000 Versa Probe II (FEI Inc.) spectrometer. Binding energy calibration was based on C1s at 284.6 eV.

**Sensing Study:**

For sensing the  $\text{Fe}^{3+}$  metal ion, the final Neo-CDs concentration was 1mg/mL and concentration of  $\text{Fe}^{3+}$  metal ion was  $10^{-5}$  M.

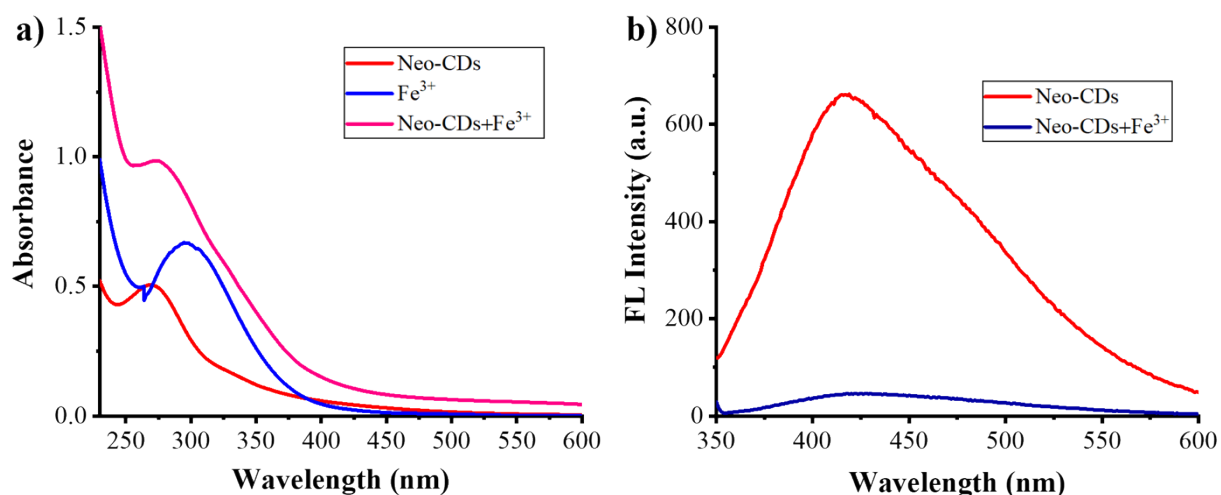

**Figure S5.** (a) The UV-vis spectra and (b) Fluorescence emission spectra of as-prepared Neo-CDs in presence and absence of  $\text{Fe}^{3+}$ .

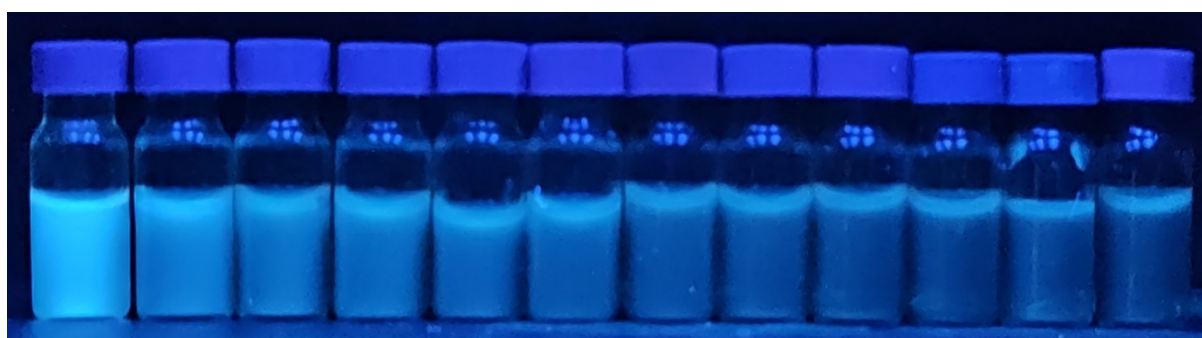

**Figure S6.** Solutions of Neo-CDs in DDW with addition of increasing concentration of  $\text{Fe}^{3+}$  ion under 365 nm UV light

### Paper Strip Preparation.

Test strips were prepared and immersed in the solution of the probe in DDW. The strips were air-dried and used for detecting  $\text{Fe}^{3+}$  in the presence of other metal ions. The test strips were observed under a 365 nm UV light, quenching of fluorescence observed with  $\text{Fe}^{3+}$ .

### Test strip for $\text{Fe}^{3+}$ detection using Neo-CDs.

For practical application the Neo-CDs was efficiently applied for detection of  $\text{Fe}^{3+}$  ion using a paper strip method. We prepared the test strip using aqueous solution and examined the

detection of Fe<sup>3+</sup>. The results are displayed in **Figure S5**. It was observed that on the strip test paper, Neo-CDs showed quenching of bright blue fluorescence under 365 nm UV light after addition of Fe<sup>3+</sup>, whereas other anions did not show any response.

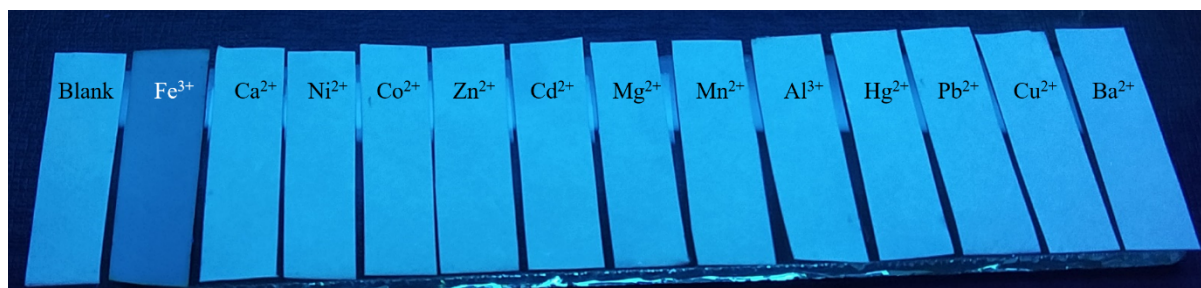

**Figure S7.** Paper strip (prepared in DDW) based selectively detection of Fe<sup>3+</sup> with Neo-CDs over other anions by naked eyes under 365 nm UV light.

**Table 2.** The comparison chart of different fluorescent probes for Fe<sup>3+</sup> ion detection

| <i>Fluorescent probes</i>                                 | <i>Detection limit<br/>(<math>\mu</math>M)</i> | <i>Reference</i> |
|-----------------------------------------------------------|------------------------------------------------|------------------|
| Graphene oxide nanosheets                                 | 17.9                                           | S1               |
| N and S doped carbon dot                                  | 0.8                                            | S2               |
| graphene quantum dots                                     | 1.49                                           | S3               |
| Nitrogen/sulphur-doped carbon dots                        | 0.56                                           | S4               |
| Nitrogen-doped carbon quantum dots                        | 9.27                                           | S5               |
| 2,2'-dipicolylamin-nitrogen-doped carbon quantum dots     | 0.92                                           | S6               |
| Graphene quantum dots from biomass waste                  | 2.5                                            | S7               |
| Carbon dots (CD)-embedded cellulose transparent film      | 2.038                                          | S8               |
| Leftover Kiwi fruit peel-derived carbon dots              | 0.92                                           | S9               |
| Polyurethane-nitrogen doped carbon dots                   | 1.15                                           | S10              |
| N-doped carbon dots                                       | 0.9                                            | S11              |
| CDs from blueberry                                        | 9.97                                           | S12              |
| Nitrogen doped CDs derived from <i>Phyllanthus acidus</i> | 0.9                                            | S13              |
| N/S doped CQDs                                            | 2.549                                          | S14              |

|                                                            |       |           |
|------------------------------------------------------------|-------|-----------|
| Cranberry Beans Derived Carbon Dots                        | 9.55  | S15       |
| Seville orange derived carbon dots                         | 0.53  | S16       |
| Dopamine functionalized S, N co-doped CDs                  | 2.86  | S17       |
| Carbon dots from Kumquat                                   | 0.7   | S18       |
| N-doped carbon dots (NCDs)                                 | 1.9   | S19       |
| Carbon dots from diammonium hydrogen citrate and urea      | 19    | S20       |
| CDs from electrochemical oxidation of graphite             | 1.8   | S21       |
| Carbon dots from dopamine and ethane-diamine               | 10.8  | S22       |
| Carbon dots from $\alpha$ -lipoic acid and ethylenediamine | 4     | S23       |
| S-doped carbon dots from cellulose fibers                  | 0.96  | S24       |
| Carbon dots from alginic acid and ethane-diamine           | 10.98 | S25       |
| N-doped carbon dots from glutamic acid                     | 4.67  | S26       |
| Neo-CDs                                                    | 0.854 | This work |

---

### References:

- S1 D. Wang, L. Wang, X. Dong, Z. Shi and J. Jin, *Carbon N. Y.*, 2012, **50**, 2147–2154.
- S2 W. Lu, X. Gong, M. Nan, Y. Liu, S. Shuang and C. Dong, *Anal. Chim. Acta*, 2015, **898**, 116–127.
- S3 L. Zhu, D. Li, H. Lu, S. Zhang and H. Gao, *Int. J. Biol. Macromol.*, 2022, **194**, 254–263.
- S4 C. Liang, X. Xie, Q. Shi, J. Feng, D. Zhang and X. Huang, *Appl. Surf. Sci.*, 2022, **572**, 151447.
- S5 Y. H. Su, H. H. Huang, C. C. Tseng, H. J. Tsai and W. K. Hsu, *RSC Adv.*, 2021, **11**, 34117–34124.
- S6 Q. Li, Z. Guo, X. Zhao, T. Zhang, J. Chen and Y. Wei, *Nanotechnology*, 2020, **31**, 335501.
- S7 A. Abbas, T. A. Tabish, S. J. Bull, T. M. Lim and A. N. Phan, *Sci. Rep.*, 2020, **10**, 1–16.
- S8 J. Woo, Y. Song, J. Ahn and H. Kim, *Cellulose*, 2020, **27**, 4609–4621.
- S9 R. Atchudan, T. N. J. I. Edison, S. Perumal, R. Vinodh, A. K. Sundramoorthy, R. S. Babu and Y. R. Lee, *Chemosensors*, 2021, **9**, 1–15.



- S10 S. Nanbedeh and K. Faghihi, *J. Fluoresc.*, 2021, **31**, 517–539.
- S11 Z. Liu, R. Jia, F. Chen, G. Yan, W. Tian, J. Zhang and J. Zhang, *J. Colloid Interface Sci.*, 2022, **606**, 567–576.
- S12 A. M. Aslandaş, N. Balci, M. Arik, H. Şakirođlu, Y. Onganer and K. Meral, *Appl. Surf. Sci.*, 2015, **356**, 747–752.
- S13 R. Atchudan, T. N. J. I. Edison, K. R. Aseer, S. Perumal, N. Karthik and Y. R. Lee, *Biosens. Bioelectron.*, 2018, **99**, 303–311.
- S14 Y. Deng, J. Qian, Y. Zhou and F. Lu, *ChemistrySelect*, 2020, **5**, 5306–5311.
- S15 M. Zulfajri, G. Gedda, C. J. Chang, Y. P. Chang and G. G. Huang, *ACS Omega*, 2019, **4**, 15382–15392.
- S16 A. M. Senol and E. Bozkurt, *Microchem. J.*, 2020, **159**, 105357.
- S17 S. Lei, N. Chang, J. Zhang and H. Wang, *Anal. Sci.*, 2021, **37**, 851–857.
- S18 B. Polatođlu and E. Bozkurt, *Res. Chem. Intermed.*, 2021, **47**, 1865–1881.
- S19 J. Cui, X. Zhu, Y. Liu, L. Liang, Y. Peng, S. Wu and Y. Zhao, , DOI:10.1021/acsanm.2c01170.
- S20 W. U. Khan, D. Wang, W. Zhang, Z. Tang, X. Ma, X. Ding, S. Du and Y. Wang, *Sci. Rep.*, 2017, **7**, 1–9.
- S21 M. Liu, Y. Xu, F. Niu, J. J. Gooding and J. Liu, *Analyst*, 2016, **141**, 2657–2664.
- S22 G. Li, N. Lv, W. Bi, J. Zhang and J. Ni, *New J. Chem.*, 2016, **40**, 10213–10218.
- S23 H. Ding, J. S. Wei and H. M. Xiong, *Nanoscale*, 2014, **6**, 13817–13823.
- S24 G. Yang, X. Wan, Y. Su, X. Zeng and J. Tang, *J. Mater. Chem. A*, 2016, **4**, 12841–12849.
- S25 Y. Liu, Y. Liu, S. J. Park, Y. Zhang, T. Kim, S. Chae, M. Park and H. Y. Kim, *J. Mater. Chem. A*, 2015, **3**, 17747–17754.
- S26 J. Yu, C. Xu, Z. Tian, Y. Lin and Z. Shi, *New J. Chem.*, 2016, **40**, 2083–2088.
